# Supplementary material for: Efficiency enhancement in a stoichiometrically stable CdS/TiO2 nanotube heterostructure electrode for sunlight-driven hydrogen generation
Source: Royal Society of Chemistry journal article supplement (doi:10.1039/d1nj00735a), 2021-01-01
Supplement: d1nj00735a1.pdf [file d1nj00735a1.pdf]

*Supporting information for the manuscript*

**Efficiency enhancement in stoichiometrically stable CdS/TiO<sub>2</sub> Nanotube heterostructure electrode for sunlight driven hydrogen generation**

V. Srimurugan, C.G. Jothiprakash, R. Prasanth\*  
UNESCO Madanjeet School of Green Energy Technologies  
Pondicherry University, Pondicherry, India.

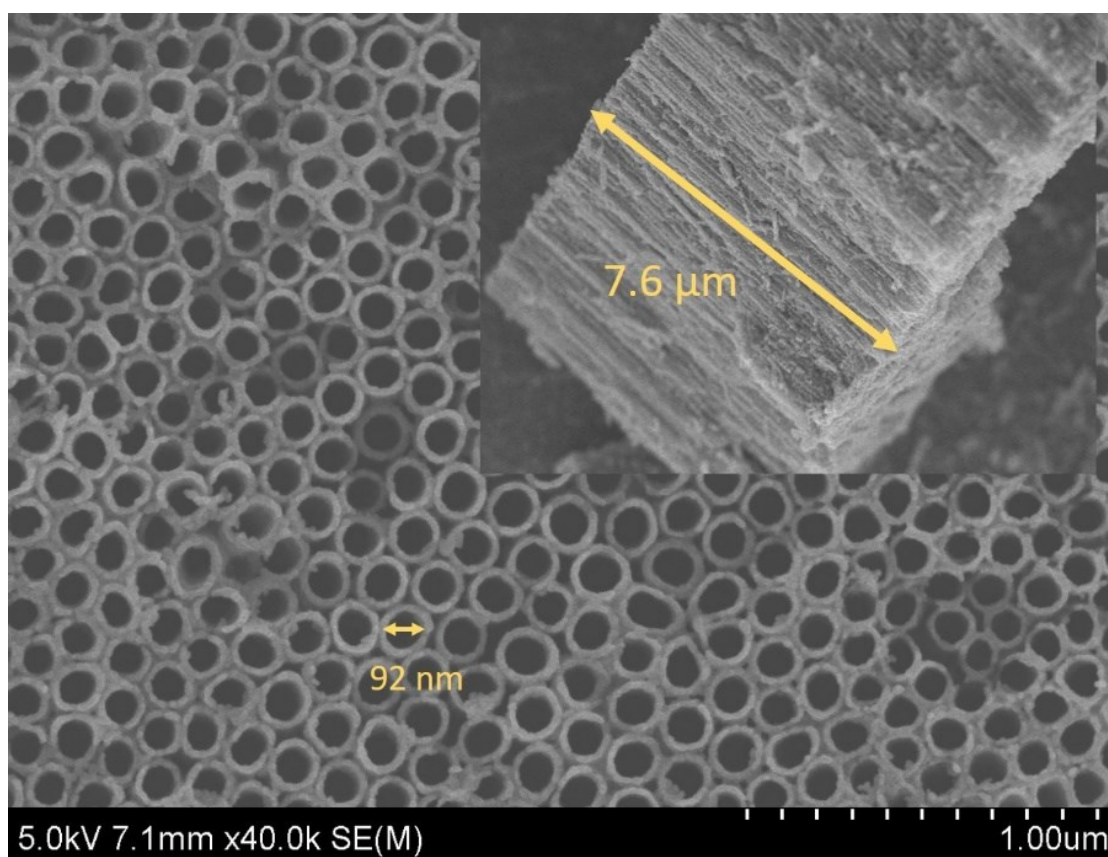

Fig. S1: FESEM images of annealed TNT arrays. Inset images is the cross-sectional view of the TNT, whose length is 7.1 μm and diameter is 92 nm

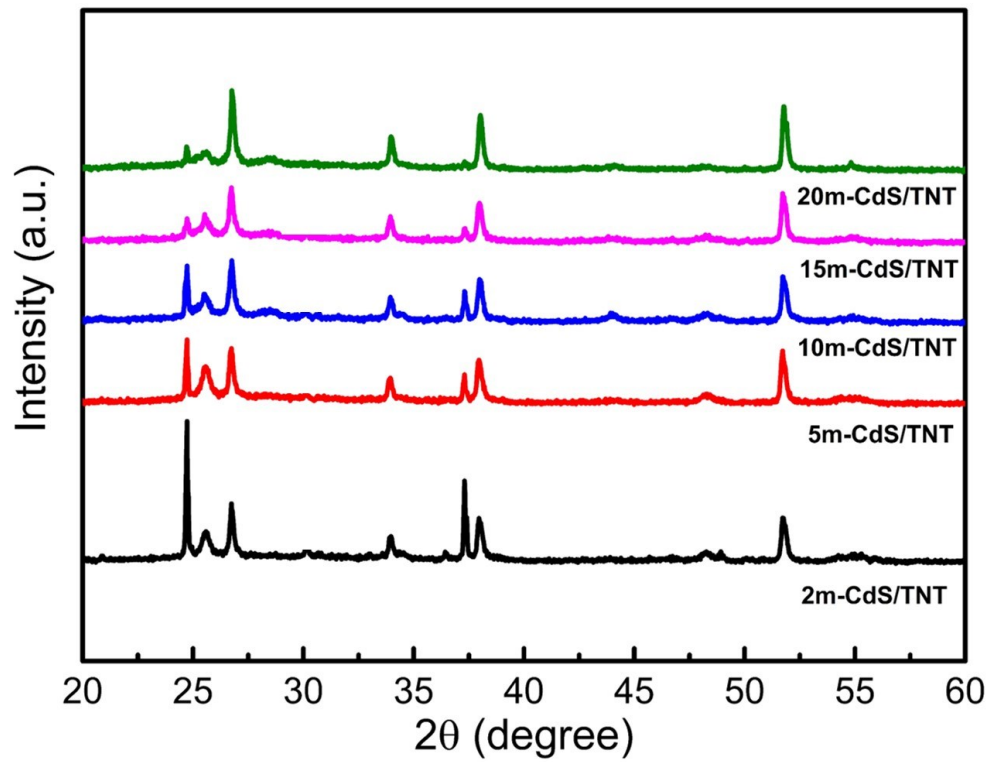

Fig. S2. XRD pattern of CdS deposited over TNT by varying the deposition time as 100 seconds, 5 minutes, 10 minutes, 15 minutes and 20 minutes.

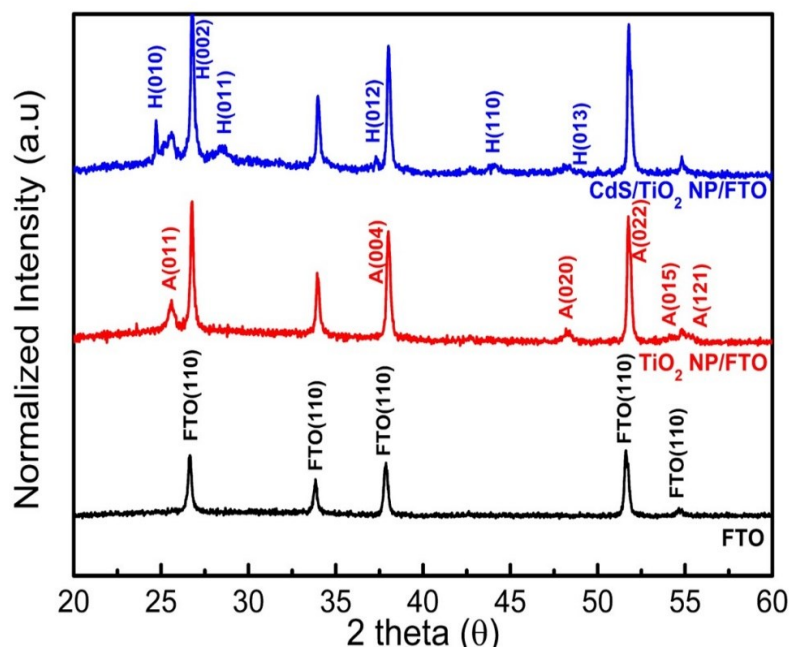

Fig. S3. XRD pattern of CdS/TNP prepared by electro deposition technique. The crystal structure of wurtzite hexagonal crystal structure CdS (ICDS:154188) can be identified. The major plane (002) of CdS situated at 26.85 ° overlap with FTO peak.

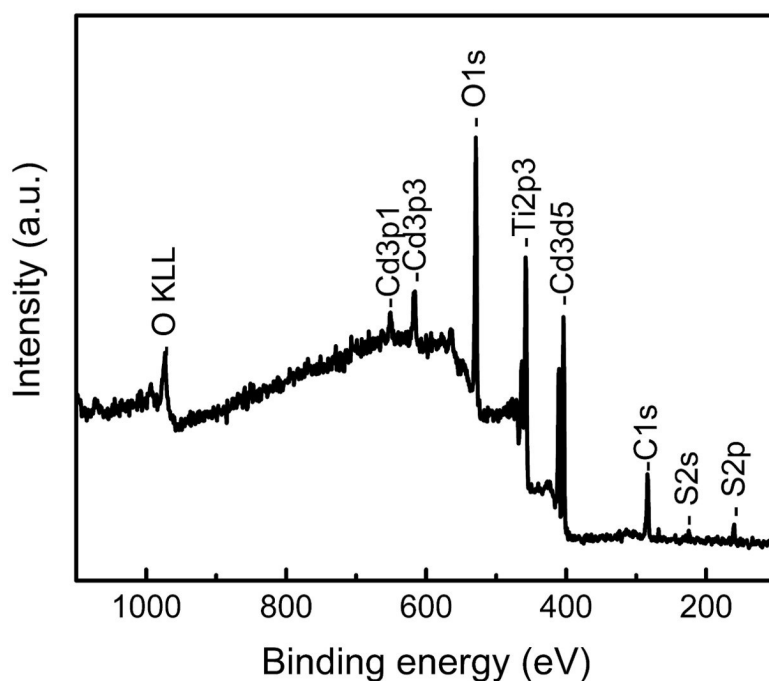

Fig. S4. XPS survey spectra of CdS/TNT nanocomposite

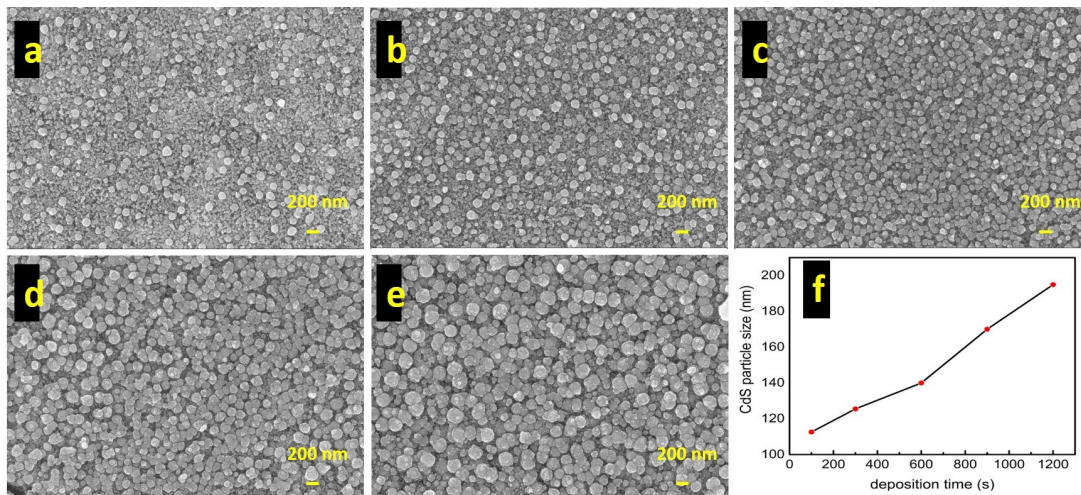

Fig. S4. FESEM images of the CdS/TNP nanocomposites. (a) 100 sec, (b) 5min, (c) 10 min, (d) 15 min, (e) 20 min. (f) CdS particle size vs deposition time.
